# Supplementary material for: A Multiparametric Method Improves the Serological Characterization of Inflammatory Bowel Diseases: Preliminary Results from a Multicenter Eastern Europe Study
Source: MDPI journal article supplement (doi:10.3390/gidisord6010011), 2024-01-29
Supplement: s1 [file s1]

## Supplementary files

**Table S1. Results of serological analysis among patients with CD (n=57), UC (n=23) and blood donors (BD) (n=20) recruited in Udine.**

|                             | CD |       | UC |       | BD |       |
|-----------------------------|----|-------|----|-------|----|-------|
|                             | N  | %     | N  | %     | N  | %     |
| PAB (IgG and/or IgA)        | 16 | 28.1% | 0  | 0.0%  | 0  | 0.0%  |
| Anti-CUDZ1 (IgG and/or IgA) | 12 | 21.5% | 0  | 0.0%  | 0  | 0.0%  |
| Anti-CUDZ1 IgG              | 10 | 17.5% | 0  | 0.0%  | 0  | 0.0%  |
| Anti-CUDZ1 IgA              | 8  | 14.0% | 0  | 0.0%  | 0  | 0.0%  |
| Anti-GP2 (IgG and/or IgA)   | 7  | 12.3% | 0  | 0.0%  | 0  | 0.0%  |
| Anti-GP2 IgG                | 5  | 8.8%  | 0  | 0.0%  | 0  | 0.0%  |
| Anti-GP2 IgA                | 5  | 8.8%  | 0  | 0.0%  | 0  | 0.0%  |
| ASCA (IgG and/or IgA)       | 42 | 73.7% | 6  | 26.1% | 4  | 20.0% |
| ASCA IgG                    | 37 | 64.9% | 2  | 8.7%  | 0  | 0.0%  |
| ASCA IgA                    | 41 | 71.9% | 5  | 21.7% | 4  | 20.0% |
| GAB (IgG and/or IgA)        | 0  | 8.0%  | 2  | 8.7%  | 0  | 0.0%  |
| GAB IgG                     | 0  | 8.0%  | 2  | 8.7%  | 0  | 0.0%  |
| GAB IgA                     | 0  | 0.0%  | 0  | 0.0%  | 0  | 0.0%  |
| Anti-LFS (IgG and/or IgA)   | 17 | 29.8% | 16 | 69.5% | 0  | 0.0%  |
| Anti-LFS IgG                | 14 | 24.6% | 14 | 60.9% | 0  | 0.0%  |
| Anti-LFS IgA                | 7  | 12.3% | 5  | 21.7% | 0  | 0.0%  |

Legend: CD= Crohn's disease; UC= ulcerative colitis; BD= blood donors PAB=antipancreatic autoantibodies; anti-CUZD1=anti-CUB/zona pellucida-like domain-containing protein antibodies; anti-GP2=anti-glycoprotein 2 antibodies; ASCA= anti-Saccharomyces cerevisiae antibodies; GAB= antibodies to goblet cells; anti-LFS=anti-DNA-bound-lactoferrin antibodies

**Table S2. Results of serological analysis among patients with CD (n=20) and UC (n=33) recruited in Belgrade.**

|                             | CD |       | UC |       |
|-----------------------------|----|-------|----|-------|
|                             | N  | %     | N  | %     |
| PAB (IgG and/or IgA)        | 3  | 15.0% | 0  | 0.0%  |
| Anti-CUDZ1 (IgG and/or IgA) | 1  | 5.0%  | 0  | 0.0%  |
| Anti-CUDZ1 IgG              | 1  | 5.0%  | 0  | 0.0%  |
| Anti-CUDZ1 IgA              | 0  | 0.0%  | 0  | 0.0%  |
| Anti-GP2 (IgG and/or IgA)   | 2  | 10.0% | 0  | 0.0%  |
| Anti-GP2 IgG                | 2  | 10.0% | 0  | 0.0%  |
| Anti-GP2 IgA                | 1  | 5.0%  | 0  | 0.0%  |
| ASCA (IgG and/or IgA)       | 17 | 85.0% | 10 | 30.3% |
| ASCA IgG                    | 17 | 85.0% | 9  | 27.3% |
| ASCA IgA                    | 11 | 55.0% | 2  | 6.1%  |
| GAB (IgG and/or IgA)        | 6  | 30.0% | 26 | 78.8% |
| GAB IgG                     | 6  | 30.0% | 26 | 78.8% |
| GAB IgA                     | 0  | 0.0%  | 6  | 18.2% |
| Anti-LFS (IgG and/or IgA)   | 3  | 15.0% | 20 | 60.6% |
| Anti-LFS IgG                | 0  | 0.0%  | 18 | 54.5% |
| Anti-LFS IgA                | 3  | 15.0% | 10 | 30.3% |

Legend: CD= Crohn's disease; UC= ulcerative colitis; PAB=antipancreatic autoantibodies; anti-CUDZ1=anti-CUB/zona pellucida-like domain-containing protein antibodies; anti-GP2=anti-glycoprotein 2 antibodies; ASCA= anti-Saccharomyces cerevisiae antibodies; GAB= antibodies to goblet cells; anti-LFS=anti-DNA-bound-lactoferrin antibodies

**Table S3. Results of serological analysis among patients with CD (n=23) recruited in Rijeka.**

|                             | CD |       |
|-----------------------------|----|-------|
|                             | N  | %     |
| PAB (IgG and/or IgA)        | 5  | 21.7% |
| Anti-CUDZ1 (IgG and/or IgA) | 4  | 17.4% |
| Anti-CUDZ1 IgG              | 4  | 17.4% |
| Anti-CUDZ1 IgA              | 2  | 8.7%  |
| Anti-GP2 (IgG and/or IgA)   | 2  | 8.7%  |
| Anti-GP2 IgG                | 2  | 8.7%  |
| Anti-GP2 IgA                | 0  | 0.0%  |
| ASCA (IgG and/or IgA)       | 19 | 82.6% |
| ASCA IgG                    | 16 | 69.6% |
| ASCA IgA                    | 16 | 69.6% |
| GAB (IgG and/or IgA)        | 2  | 8.7%  |
| GAB IgG                     | 2  | 8.7%  |
| GAB IgA                     | 1  | 4.4%  |
| Anti-LFS (IgG and/or IgA)   | 5  | 21.7% |
| Anti-LFS IgG                | 4  | 17.4% |
| Anti-LFS IgA                | 3  | 13.0% |

Legend: CD= Crohn's disease; UC= ulcerative colitis; PAB=antipancreatic autoantibodies; anti-CUZD1=anti-CUB/zona pellucida-like domain-containing protein antibodies; anti-GP2=anti-glycoprotein 2 antibodies; ASCA= anti-Saccharomyces cerevisiae antibodies; GAB= antibodies to goblet cells; anti-LFS=anti-DNA-bound-lactoferrin antibodies.

**Table S4. Distribution of demographics, lifestyle habits, clinical characteristic as well as results of other serological analysis in CD patients (n=100) in relation to presence of anti-CUZD1 antibodies.**

|                                 | <b>anti-CUZD1<br/>positive</b> |       | <b>anti-CUZD1<br/>negative</b> |       |      |
|---------------------------------|--------------------------------|-------|--------------------------------|-------|------|
| Gender                          | N                              | %     | N                              | %     | p    |
| Female                          | 8                              | 47.1% | 41                             | 49.4% | 0.86 |
| Smoking                         | 9                              | 52.9% | 48                             | 57.8% | 0.71 |
| <b>Age at diagnosis</b>         |                                |       |                                |       |      |
| >40                             | 2                              | 11.8% | 18                             | 20.5% | 0.50 |
| 16-40                           | 13                             | 76.5% | 51                             | 61.5% |      |
| <16                             | 2                              | 11.8% | 15                             | 18.1% |      |
| <b>Clinical characteristics</b> |                                |       |                                |       |      |
| Perianal disease                | 7                              | 41.2% | 22                             | 26.5% | 0.23 |
| Deep mucosal lesions            | 10                             | 58.8% | 23                             | 27.7% | 13   |
| Colon involvement               | 15                             | 88.2% | 52                             | 62.7% | 41   |
| <b>Disease behavior</b>         |                                |       |                                |       |      |
| None                            | 10                             | 58.8% | 42                             | 50.6% | 0.79 |
| Strictureing                    | 4                              | 25.5% | 26                             | 31.3% |      |
| Penetrating                     | 3                              | 17.7% | 15                             | 18.1% |      |
| Extensive involvement           | 7                              | 41.2% | 21                             | 25.3% | 0.19 |
| Previous surgery                | 8                              | 47.1% | 38                             | 45.8% | 0.92 |
| Biologics                       | 14                             | 82.4% | 40                             | 48.2% | 0.01 |
| Extra intestinal manifestations | 10                             | 58.8% | 36                             | 43.4% | 0.24 |
| <b>Other autoantibodies</b>     |                                |       |                                |       |      |
| Anti-GP2                        | 4                              | 25.5% | 7                              | 8.4%  | 0.07 |

|          |    |       |    |       |      |
|----------|----|-------|----|-------|------|
| ASCA     | 13 | 76.5% | 65 | 78.3% | 0.87 |
| GAB      | 1  | 5.9%  | 7  | 8.4%  | 0.72 |
| Anti-LFS | 5  | 29.4% | 20 | 24.1% | 0.65 |

Legend: CD= Crohn's disease; UC= ulcerative colitis; PAB=antipancreatic autoantibodies; anti-CUZD1=anti-CUB/zona pellucida-like domain-containing protein antibodies; anti-GP2=anti-glycoprotein 2 antibodies; ASCA= anti-Saccharomyces cerevisiae antibodies; GAB= antibodies to goblet cells; anti-LFS=anti-DNA-bound-lactoferrin antibodies

**Table S5. Distribution of demographics, lifestyle habits, clinical characteristic as well as results of other serological analysis in CD patients (n=100) in relation to presence of anti-GP2 antibodies.**

|                                 | Anti-GP2<br>positive |       | Anti-GP2<br>negative |       |       |
|---------------------------------|----------------------|-------|----------------------|-------|-------|
| Gender                          | N                    | %     | N                    | %     | p     |
| Female                          | 4                    | 36.4% | 45                   | 50.6% | 0.37  |
| Smoking                         | 4                    | 36.4% | 39                   | 43.8% | 0.64  |
| Age at diagnosis                |                      |       |                      |       |       |
| >40                             | 2                    | 18.2% | 17                   | 19.1% | 0.26  |
| 16-40                           | 9                    | 81.8% | 55                   | 61.8% |       |
| <16                             | 0                    | 0.0%  | 17                   | 19.1% |       |
| Clinical characteristics        |                      |       |                      |       |       |
| Perianal disease                | 3                    | 27.8% | 26                   | 29.1% | 0.89  |
| Deep mucosal lesions            | 7                    | 63.6% | 26                   | 29.1% | 0,022 |
| Colon involvement               | 10                   | 90.9% | 57                   | 64.0% | 0.07  |
| Disease behavior                |                      |       |                      |       |       |
| None                            | 3                    | 27.2% | 49                   | 55.1% | 0.14  |
| Strictureing                    | 4                    | 36.4% | 26                   | 29.2% |       |
| Penetrating                     | 4                    | 36.4% | 14                   | 15.7% |       |
| Extensive involvement           | 5                    | 45.5% | 23                   | 25.8% | 0.17  |
| Previous surgery                | 7                    | 63.6% | 39                   | 43.8% | 0.21  |
| Biologics                       | 9                    | 81.8% | 45                   | 50.6% | 0.05  |
| Extra intestinal manifestations | 5                    | 45.5% | 41                   | 46.1% | 0.97  |
| Other autoantibodies            |                      |       |                      |       |       |
| Anti-CUZD1                      | 4                    | 36.4% | 13                   | 14.6% | 0.07  |
| ASCA                            | 8                    | 72.7% | 70                   | 78.7% | 0.66  |

|                          |   |       |    |       |      |
|--------------------------|---|-------|----|-------|------|
| GAB                      | 0 | 0.0%  | 8  | 9.0%  | 0.30 |
| Anti-LFS<br>granulocytes | 5 | 45.0% | 20 | 22.5% | 0.10 |

Legend: anti-GP2=anti-glycoprotein 2 antibodies; anti-CUZD1=anti-CUB/zona pellucida-like domain-containing protein antibodies; ASCA= anti-Saccharomyces cerevisiae antibodies; GAB= antibodies to goblet cells; anti-LFS=anti-DNA-bound-lactoferrin antibodies.
